# Supplementary material for: Harnessing zinc(ii) chelation for fluorescence determination of besifloxacin in ophthalmic and biological matrices
Source: Royal Society of Chemistry journal article supplement (doi:10.1039/d5ay00894h), 2025-01-01
Supplement: d5ay00894h1.pdf [file d5ay00894h1.pdf]

# Supplementary Information

## Harnessing Zinc (II) Chelation for Fluorescence Determination of Besifloxacin in Ophthalmic and Biological Matrices

Islam M. Mostafa<sup>a,b\*</sup>, Demiana W. Fakhry<sup>c</sup>, Mohamed A. Abdelshakour<sup>c</sup>, Deena A. M. Nour El-Deen<sup>a,b</sup>

<sup>a</sup> Analytical Chemistry Department, Faculty of Pharmacy, Minia University, Minia, 61511, Egypt

<sup>b</sup> Analytical Chemistry Department, Faculty of Pharmacy, Minia National University, New Minia, 61511, Egypt

<sup>c</sup> Department of Pharmaceutical Analytical Chemistry, Faculty of Pharmacy, Sohag University, Sohag 82524, Egypt.

### List of content

**Table S1.** Comparison between the analytical performance of the developed method and other reported methods.

**Figure S1.** Stoichiometry of the reaction between zinc(II) and BFN using Job's method.

**Figure S2.** UV spectrum of BFN (20 µg/mL) in the presence and absence of zinc(II).

**Figure S3.** Calibration curve for the determination of BFN by the proposed method.

**Figure S 4.** Greenness and blueness evaluation of the developed method using (A) AGREE metric, and (B) BAGI metric, respectively.

**Table S1.** Comparison between the analytical performance of the developed method and other reported methods.

| Method                                                                                                                                       | Linear range                                             | LOD                         | LOQ                         | Applications                             | Remarks                                                                    | Ref.         |
|----------------------------------------------------------------------------------------------------------------------------------------------|----------------------------------------------------------|-----------------------------|-----------------------------|------------------------------------------|----------------------------------------------------------------------------|--------------|
| HPLC                                                                                                                                         | 0.3 – 2.3 µg/mL                                          | 0.07 µg/mL                  | 0.3 µg/mL                   | Dosage form                              | - Low sensitivity<br>-Hazardous solvents                                   | [1]          |
| UHPLC                                                                                                                                        | 0.75-3.75 µg/mL                                          | 0.1 µg/mL                   | 0.5 µg/mL                   | Dosage form                              | -Expensive instrumentation<br>-Moderate sensitivity<br>-Hazardous solvents | [2]          |
| HPLC                                                                                                                                         | 0.9-7.5 µg/mL                                            | 0.30 µg/mL                  | 0.90 µg/mL                  | Dosage form                              | - Low sensitivity<br>-Hazardous solvents                                   | [3]          |
| Electrochemical method                                                                                                                       | $2.2 \times 10^{-6}$ mol/L to $5.5 \times 10^{-5}$ mol/L | $9.12 \times 10^{-7}$ mol/L | $3.04 \times 10^{-6}$ mol/L | Dosage form                              | -Electrode modification                                                    | [4]          |
| Spectrophotometry                                                                                                                            | 3-30 µg/ml                                               | 0.62, 0.72 and 0.88 µg/ml   | 1.88, 2.10, 2.60 µg/ml      | Dosage form and simulated tears          | - Low sensitivity                                                          | [5]          |
| Spectrofluorimetry                                                                                                                           | 200-1000 ng/mL                                           | 8.47 ng/mL                  | 28.24 ng/mL                 | Dosage form and simulated tears          | - Required derivatization<br>-Expensive reagent                            | [6]          |
| Spectrofluorimetry (based on Hantzsch condensation reaction and measuring fluorescence at $\lambda_{ex}$ of 400 nm ( $\lambda_{em}$ =485nm)) | 0.15-1.0 (µg/mL)                                         | 0.02 µg/mL                  | 0.05 µg/ml                  | Dosage form and aqueous humor            | - Required derivatization<br>-Moderate sensitivity<br>- Long heating time  | [7]          |
| Spectrofluorimetry (based on the formation of micelle and measuring fluorescence at $\lambda_{ex}$ of 274 nm ( $\lambda_{em}$ =446nm))       | 5.0 - 100 ng/mL                                          | 0.64 ng/mL                  | 1.93 ng/ml                  | Dosage form and artificial aqueous humor | -Dependency on precise surfactant concentration<br>- Green<br>- Simple     | [8]          |
| Spectrofluorimetry                                                                                                                           | 10 – 150 ng/mL                                           | 2.0 ng/mL (4.64 nM)         | 6.08 ng/mL                  | Dosage form and aqueous                  | - Simple<br>- No derivatization                                            | Present work |

|  |  |           |       |                |  |
|--|--|-----------|-------|----------------|--|
|  |  | (14.1 nM) | humor | - Eco-friendly |  |
|--|--|-----------|-------|----------------|--|

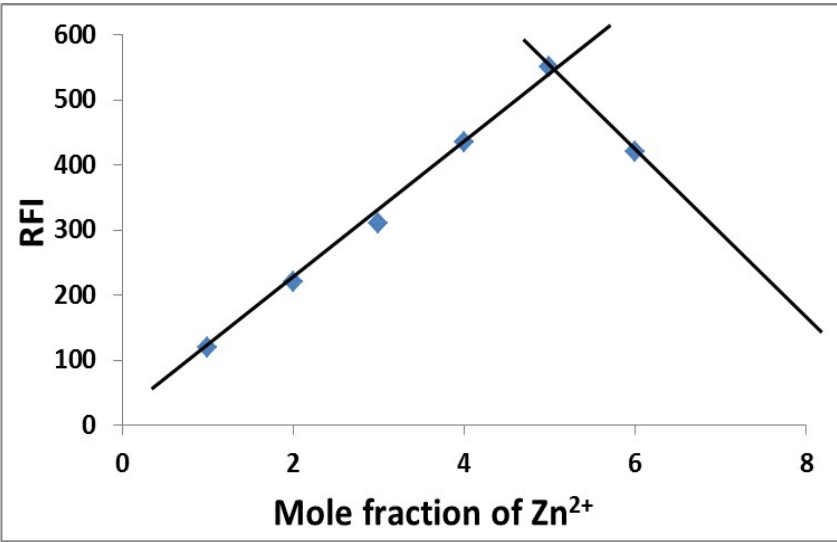

**Figure S1.** Stoichiometry of the reaction between zinc(II) and BFN using Job's method.

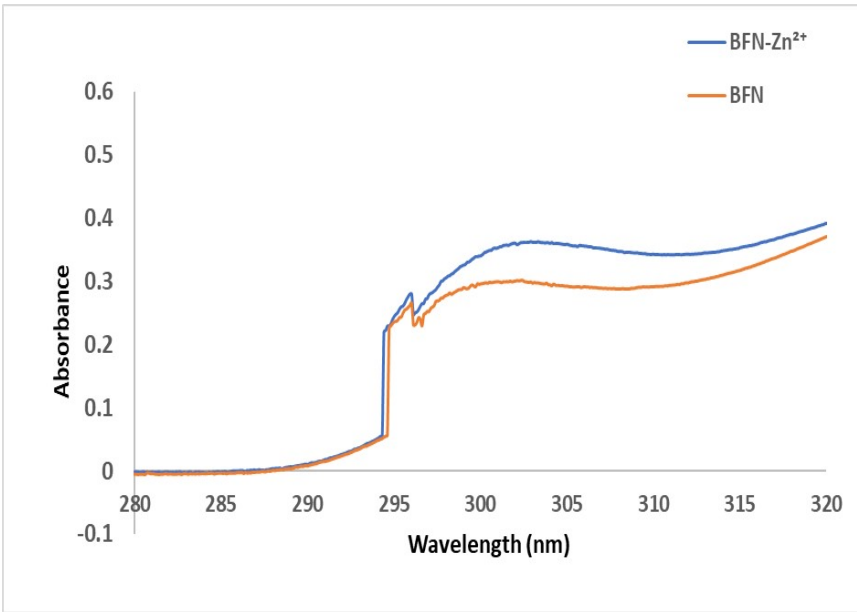

**Figure S2.** UV spectrum of BFN (20 µg/mL) in the presence and absence of zinc(II).

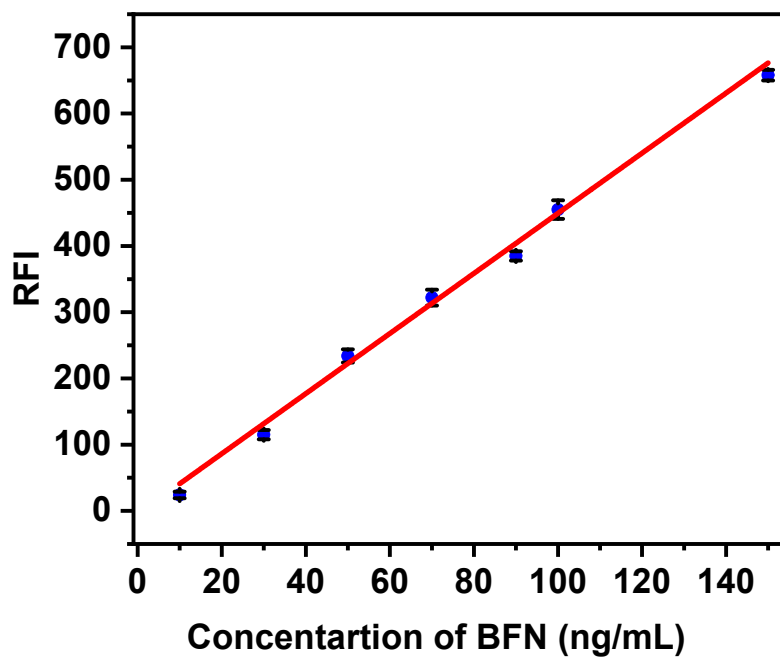

**Figure S3.** Calibration curve for the determination of BFN by the proposed method.

**Table S2.** Robustness of the proposed method for determination of BFN (100 ng mL<sup>-1</sup>)

| Parameters                    | % Recovery $\pm$ RSD |
|-------------------------------|----------------------|
| <i>pH of buffer</i>           |                      |
| 5.8                           | 97.32 $\pm$ 0.43     |
| 6.0                           | 100.16 $\pm$ 0.45    |
| 6.2                           | 98.63 $\pm$ 0.44     |
| <i>Zn<sup>2+</sup> volume</i> |                      |
| 0.8                           | 97.72 $\pm$ 1.26     |
| 1.0                           | 99.99 $\pm$ 0.33     |
| 1.2                           | 100.89 $\pm$ 0.47    |

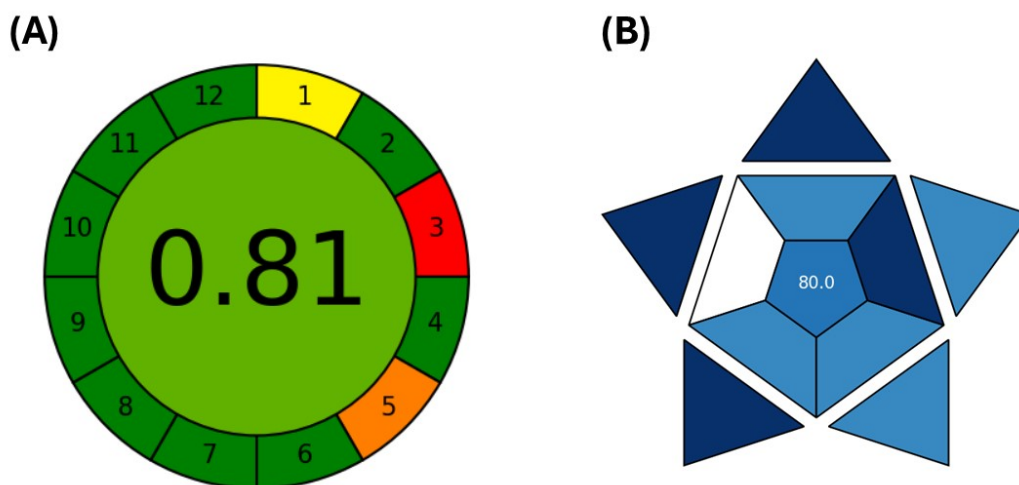

**Figure S 4.** Greenness and blueness evaluation of the developed method using (A) AGREE metric, and (B) BAGI metric, respectively.

## References

- [1] J. W. Manoel, C. F. Alves Giordani, L. M. Bueno, S. C. Campanharo, E. E. Sherman Schapoval, C. V. Garcia, M. Steppe and N. M. Volpato, *Curr. Pharm. Anal.*, 2021, 17, 564-572.
- [2] N. R. Ramisetty, M. S. Arnipalli, N. V. Nimmu and R. Bondigalla, *Chromatographia*, 2017, 80, 1509-1515.
- [3] G. P. Kumar, V. Srivastava, K. Khandelwal, R. Kumar, S. G. Hiriyanna, A. Kumar and P. Kumar, *Chirality*, 2016, 28, 628-632.
- [4] A. K. Attia, A. M. Badawy and S. G. Abd-Elhamid, *RSC Adv.*, 2016, 6, 39605-39617.
- [5] C. L. Singh, A. Singh, S. Kumar, M. Kumar, P. K. Sharma and D. K. Majumdar, *Indian J. Pharm. Sci.*, 2015, 77, 399.
- [6] S. S. Abd El-Hay and H. M. El-Sayed, *Curr. Pharm. Anal.*, 2018, 14, 198-203.
- [7] I. M. Mostafa, M. A. Omar, M. A. Elsayed and A. A. J. L. Mohamed, *Luminescence*, 2025, 40, e70154.
- [8] I. M. Mostafa, D. W. Fakhry, M. A. Abdelshakour and D. A. M. El-Deen, *J. Fluoresc.*, 2025, DOI: 10.1007/s10895-025-04310-1.
